# Supplementary material for: Neural dynamics of phoneme sequences reveal position-invariant code for content and order
Source: PubMed Central journal article supplement (PMC9633780; doi:10.1038/s41467-022-34326-1), 2022-11-03
Supplement: 41467_2022_34326_MOESM1_ESM.pdf [file 41467_2022_34326_MOESM1_ESM.pdf]

## 1. Supplementary Notes

In addition to the analyses presented in the main text, we conducted a series of analyses presented here. They can be organised into four types: (i) comparisons between different types of decoding algorithms to validate our approach; (ii) manipulation of signal to noise ratio through the addition of noise or reduction of trial count to ensure that main claims remain true; (iii) additional analyses of interest, which probe representations and representational dynamics; (iv) exploration of the spatial evolution of representations through space, by analysing model beta coefficients.

### 1.1. *Validation of analysis approach*

#### 1.1.1. *Back-to-back regression*

Comparing logistic decoding of phonetic features to the back-to-back regression algorithm.

### 1.2. *SNR manipulation*

#### 1.2.1. *Signal to noise ratio manipulation on acoustic generalisation analysis*

Testing whether SNR affects decoding dynamics from acoustic signal.

#### 1.2.2. *Strength of MEG signal and its relation to decoding performance*

Testing whether SNR affects decoding dynamics from neural signal.

#### 1.2.3. *Analysis on equalised trial counts*

Replicating decoding analysis on equalised trial counts across phoneme positions.

### 1.3. *Additional analyses of interest*

#### 1.3.1. *Sequence analysis on mel spectrogram*

Applying decoding analysis to the auditory signal.

#### 1.3.2. *History and future decoding*

Testing hypotheses of sequence representations.

#### 1.3.3. *Sequence representation for different phonetic features*

Confirming that decoding dynamics replicate across feature types.

#### 1.3.4. *Dynamics at sentence onset and sentence offset*

Testing the dynamics of processing depending on global predictability.

#### 1.3.5. *Testing granularity of representation*

Comparing representational formats that correlate with phonetic features.

### 1.4. *Spatial evolution of encoding*

#### 1.4.1. *Beta coefficients of decoding model*

Timecourse of model coefficients over space, for each feature in the model.

33 **Validation of analysis approach**

34 *1.1.1 Validation of back-to-back regression*

35 Here we compare the results of the more classic logistic regression analysis with the results  
36 of the back-to-back regression we employ in this paper. The results are comparable, with the  
37 advantage of B2B providing cleaner, stronger estimates with less variance.

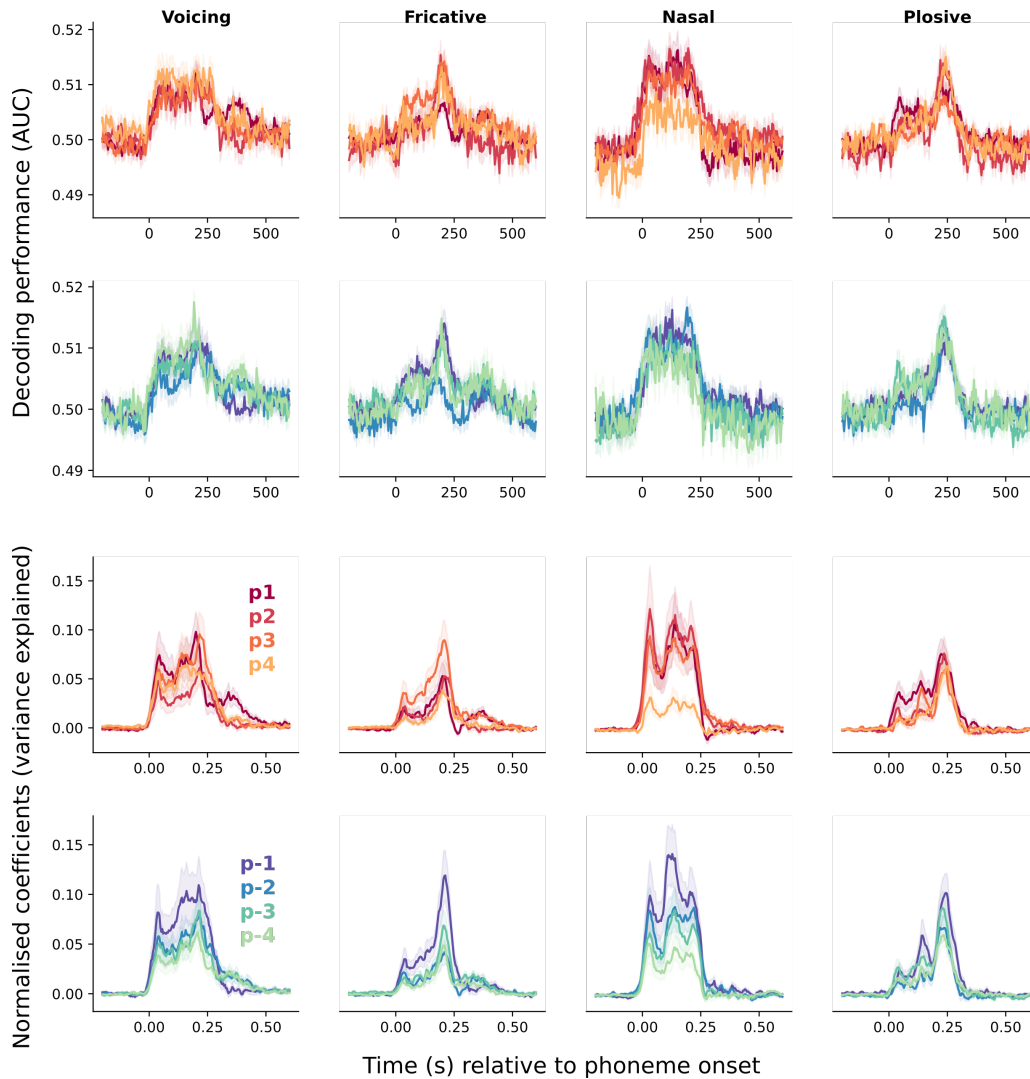

Supplementary Figure 1: **Comparing logistic regression to back-to-back regression.** Above: Results of decoding four phonetic features using ‘classic’ logistic regression decoding analysis with AUC as the performance metric. Each line corresponds to a different phoneme location in the word. Below: Same analysis when using back-to-back regression. Shading in the two plots corresponds to the standard error of the mean across 21 participants.

38 **SNR manipulation**

39 *1.2.1. Signal to noise ratio manipulation on acoustic generalisation analysis*

40 To test whether the sustained generalisation we observe in the auditory analysis is due to the  
41 relatively high SNR as compared to the MEG data, we re-ran the generalisation analysis when  
42 adding different levels of noise to the mel spectrogram. We observe a sustained decoding pattern  
43 at all SNR levels.

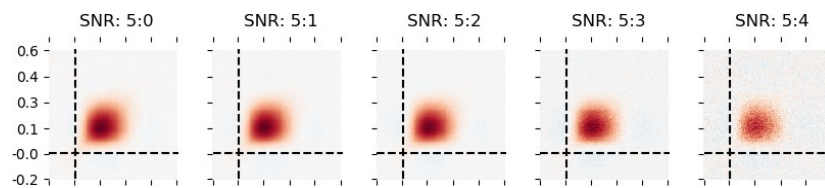

Supplementary Figure 2: **SNR manipulation on auditory mel spectrogram decoding.** x-axis corresponds to time in seconds relative to training the classifier. The y-axis corresponds to time in seconds relative to testing the classifier.

44 *1.2.2. Strength of MEG signal and its relation to decoding performance*

45 One potential confound in decoding performance is the overall signal strength (e.g. magni-  
46 tude of the MEG response). It is possible that stimulus features which lead to larger responses  
47 will, in turn, aid better decodability of the other features encoded in that response. To test whether  
48 this was the case, we computed the root mean square (RMS) of the sensor data and attempted  
49 to decode this from the z-scored MEG responses, from 200 ms to 1000 after to each phoneme  
50 onset. For this, we used a Ridge regression decoder with Spearman R as the performance metric.  
51 First, we found that overall signal strength did not show the temporal dynamics that were elicited  
52 by any of our stimulus features of interest (see below figure). Second, we fit a mixed effects  
53 regression model between the single-trial RMS and decoding accuracy, for phonation, manner,  
54 and place of articulation. We modelled random slopes per participant and repetition. There was  
55 no significant relationship for any of the three features  $p$ 's  $> .3$ . Overall this suggests that the  
56 features we show to interact with phonetic encoding strength (e.g. surprisal and entropy) cannot  
57 be explained by the global strength of the signal. We believe the lack of effect may be due to our  
58 stimuli: continuous speech does not elicit clear evoked responses, and so single-trial variability  
59 in signal strength is negligible.

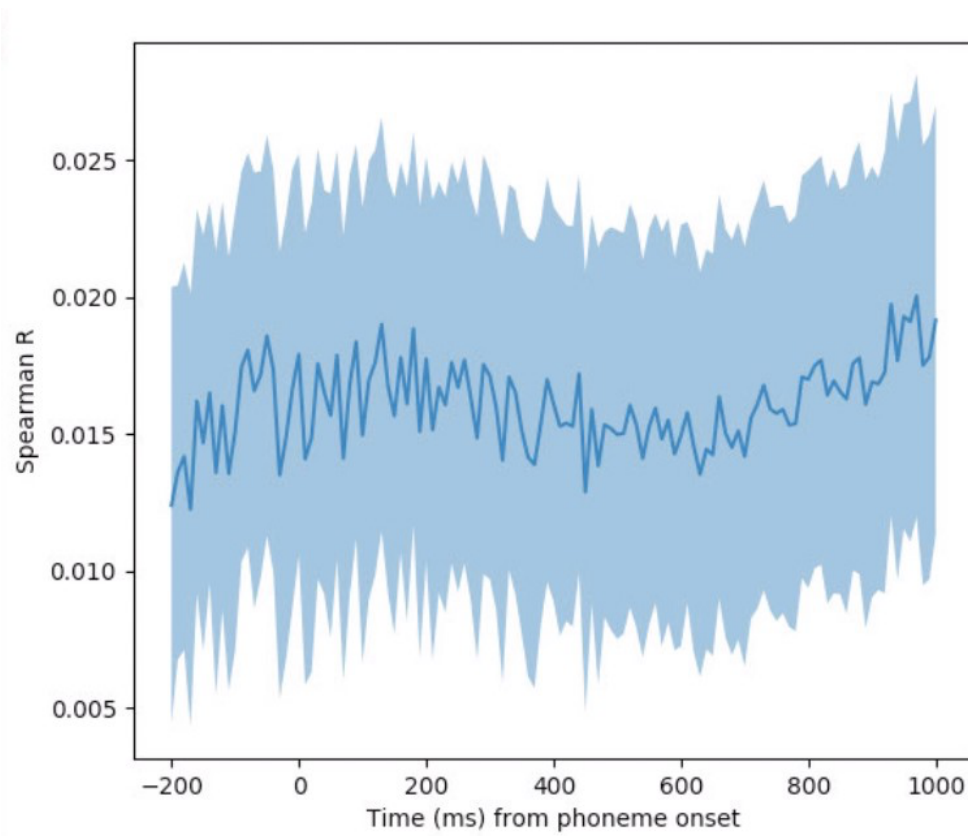

Supplementary Figure 3: **Decoding MEG signal strength.** Center trace represents average decoding performance over 21 participants. Shading represents standard error of the mean over participants.



60 1.2.3. Analysis on equalised trial counts

61 Due to the natural variation in word length, there were different numbers of trials included in  
62 the decoding analysis at phoneme positions. Maximum numbers of trials at the word boundaries  
63 (because all words have an onset and an offset) and gradually decreasing numbers of trials as  
64 the position moves further from the boundary. Estimates of decodability are noisier for phoneme  
65 positions with fewer trials. To allow direct comparisons of decoding strength across positions,  
66 we re-ran the analysis matching the number of trials to the fourth phoneme position (about 1500  
67 trials).

68 Once the number of trials was equalised across positions, there were no significant differences  
69 in the strength of phoneme decoding. We replicate all the main results on this subset of trials.

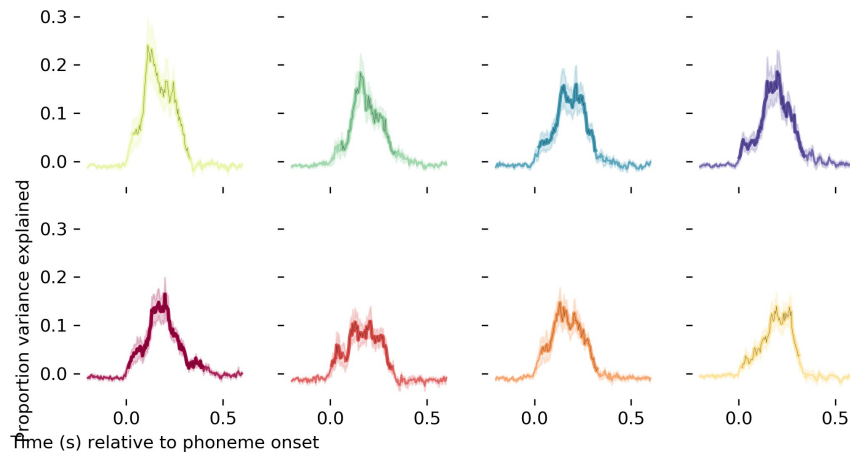

Supplementary Figure 4: **Diagonal decoding on equalised phoneme counts.** Trace represents average decoding performance over 21 participants. Shading represents standard error of the mean over participants.

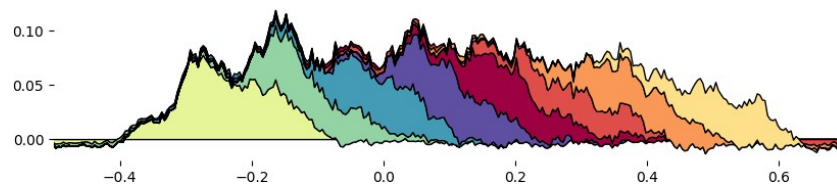

Supplementary Figure 5: **Cumulative diagonal decoding.** Each colour represents one of the 10 phoneme positions. Variance explained is cumulated over phoneme positions.

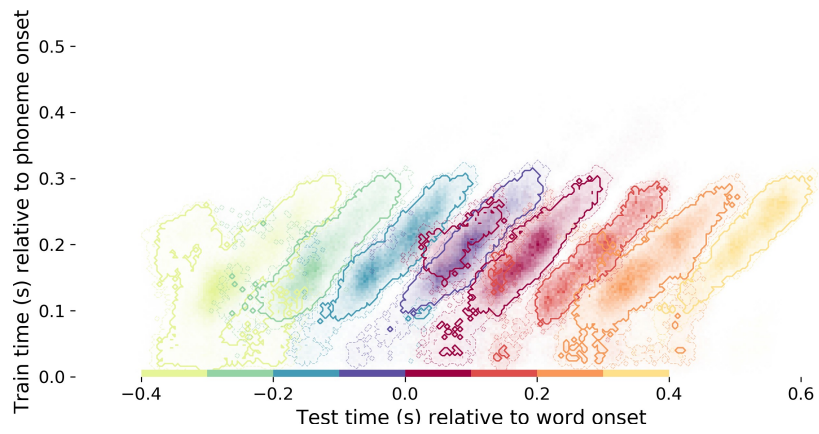

Supplementary Figure 6: **Temporal generalisation decoding on equalised phoneme counts.** Figure details are the same as in Main Figure 3.

70 **Additional analyses of interest**

71 *1.3.1. Sequence analysis on mel spectrogram*

72 One of our claims is that there is very little representational overlap between consecutive  
73 speech sounds in the neural data, whereas there is a lot of overlap in the auditory signal. Here  
74 we show the equivalent of main Figure 3, panels A and B, when applied to the mel spectrogram  
75 rather than the MEG responses.

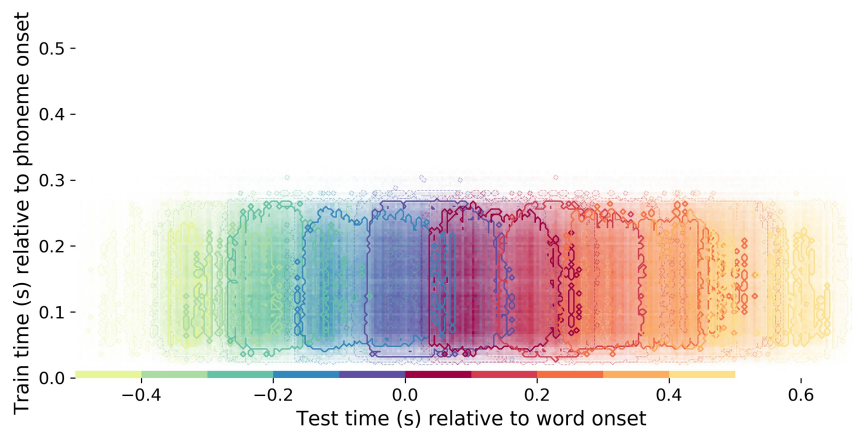

Supplementary Figure 7: **Temporal generalisation analysis of each phoneme position applied to the mel spectrogram.** Figure details are the same as in Main Figure 3.

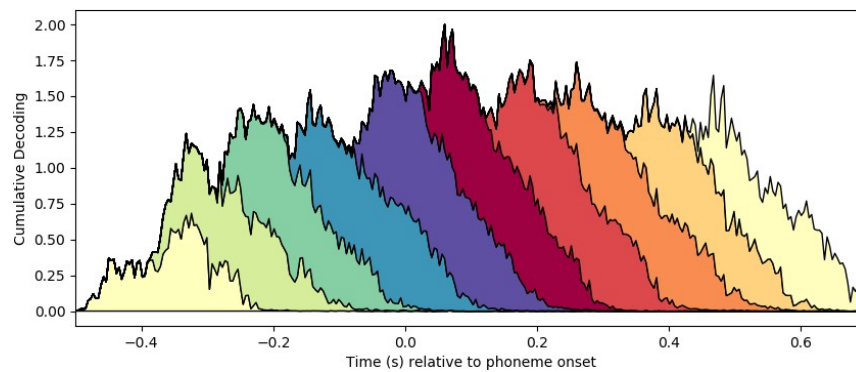

Supplementary Figure 8: **Cumulative decoding performance across the sequence, applied to mel spectrogram.** Each colour represents a different phoneme position.

76 1.3.2. History and future decoding

77 Our results suggest that at the brain processes at least three phonemes concurrently. To add  
78 further support to this claim, we decoded the content of three preceding phonemes and three  
79 subsequent phonemes from a given moment in test time. As shown in Figure 9, we can indeed  
80 decode the phonetic content of three phonemes from the same neural response. This was clearer  
81 for voicing and manner than place of articulation, in line with the general trend that place of  
82 articulation is not as robustly encoded as the other properties [1, 2]. For the history decoding,  
83 decoding performance appears to peak time-locked to the onset of subsequent phonemes, perhaps  
84 suggestive of a re-activation procedure. This is in line with previous results from our lab (e.g.  
85 [3]).

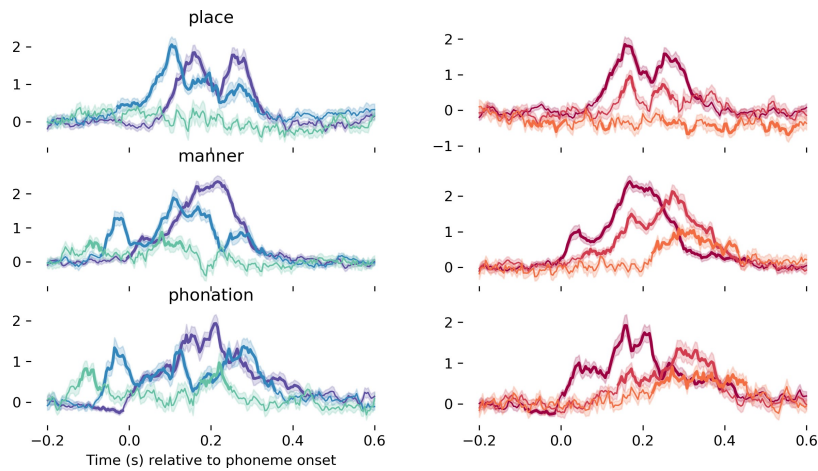

Supplementary Figure 9: **Decoding phonetic history and future from a single neural timecourse.** Trace represents average decoding performance over 21 participants. Shading represents standard error of the mean over participants.

86 *1.3.3. Sequence representation for different phonetic features*

87 A lot of the analyses we applied were aggregated over the individual phonetic features. How-  
88 ever, even though the individual feature sequence maps are noisier, they show the same diagonal  
89 patterns as the full aggregated data.

90 There are, however, some interesting dynamics that may be worth exploring in future work.  
91 For example, the voicing feature is appears more sustained across positions. And the ‘appendage’  
92 of the first phoneme appears most pronounced for manner of articulation.

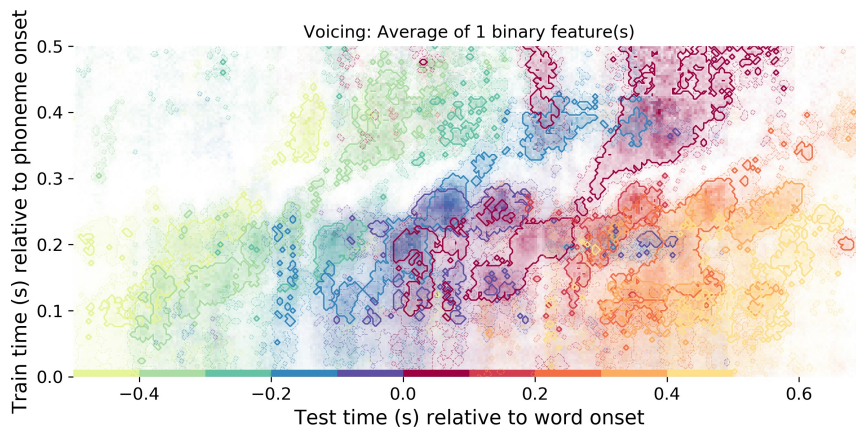

Supplementary Figure 10: **Sequence decoding for voicing**. Figure details are the same as in Main Figure 3.

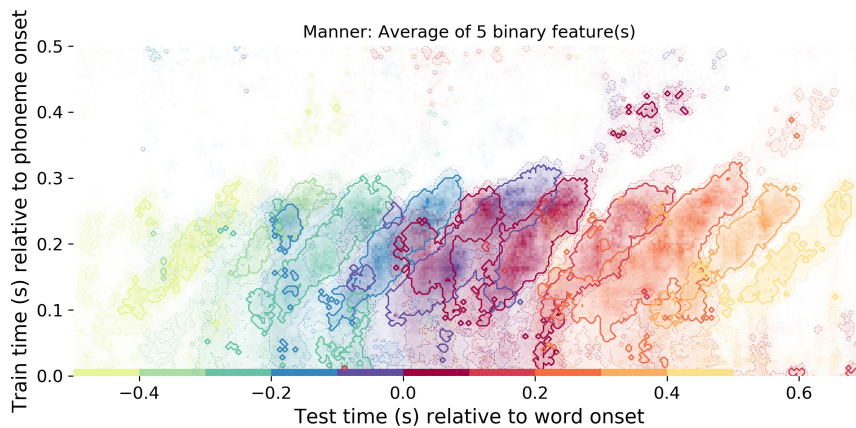

Supplementary Figure 11: **Sequence decoding for manner**. Figure details are the same as in Main Figure 3.

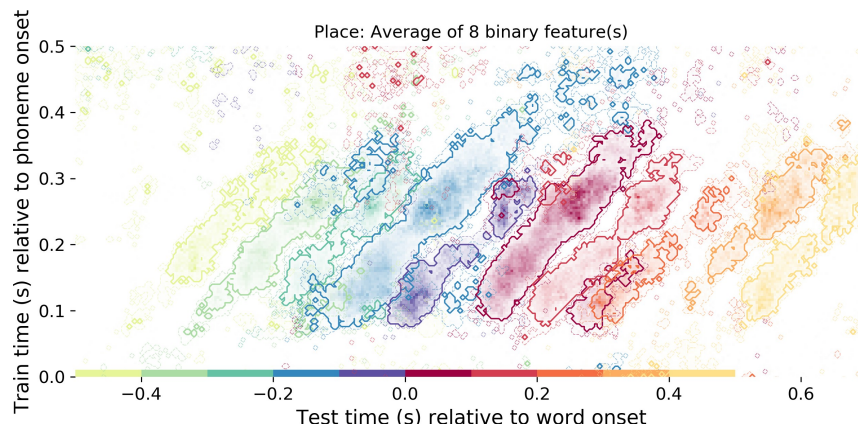

Supplementary Figure 12: **Sequence decoding for place of articulation.** Figure details are the same as in Main Figure 3.

93 *1.3.4. Dynamics at sentence onset and sentence offset*

94 We re-ran the neural generalisation analysis on two subsets of phonemes. First, testing on all  
95 phonemes at the onset of words and the onset of sentences (and training on all others). Second,  
96 testing on all phonemes at the offset of words and at the offset of sentences (and training on all  
97 others). The goal was to test whether (i) the ‘appendage’ observed for the onset phoneme was  
98 caused by predictability of the phoneme in context, in which case we should not observe it at the  
99 beginning of sentences because there is no context upon which to generate reliable predictions;  
100 (ii) whether we still observe ‘diagonal dynamics’ when the phoneme is followed by silence. The  
101 model was fit on responses to about 20,000 phonemes and tested on about 500 phonemes. The  
102 results show average decoding performance across phonetic features.

103 Interesting we observe that the ‘appendage’ is still present for onset phonemes at the begin-  
104 ning of sentences. This suggests that the maintenance of phonetic features may be some that  
105 always happens at the beginning of words, regardless of how predictable the word is in context.  
106 Future work should test the reason for this.

107 Furthermore we find that the diagonal pattern is also present for phonemes at the end of  
108 sentences which are followed by silence. It seems that phonetic detail is actually maintained  
109 during the silent period, another fascinating result which should be followed up with subsequent  
110 research.

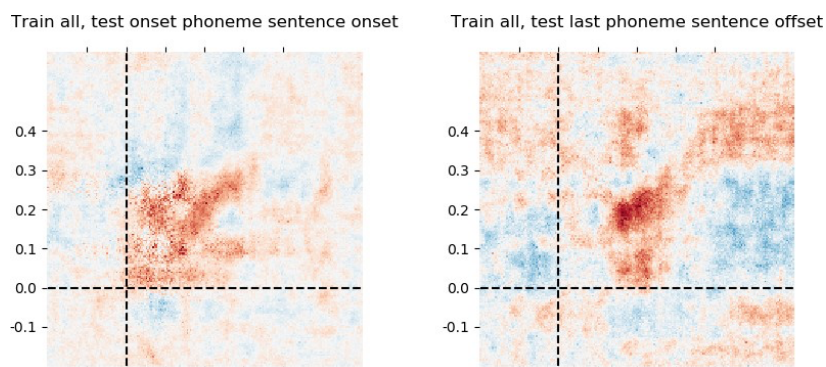

Supplementary Figure 13: **Generalisation analysis applied to the first phoneme of a sentence and the last phoneme of a sentence.** x-axis corresponds to time in seconds relative to training the classifier on all phoneme responses. The y-axis corresponds to time in seconds relative to testing the classifier on responses to the first phoneme in the sentence (left) and the last phoneme in the sentence (right).



111 *1.3.5. Testing granularity of representation*

112 Throughout the manuscript we focus on phonetic features as the way to represent linguisti-  
113 cally relevant information about speech sounds. One possibility is that, during the timecourse of  
114 processing, representations evolve from more sensory to more abstract - e.g. from acoustics to  
115 phonetic features to phoneme categories.

116 We ran the analysis on the raw (not acoustically residual data), trying to decode (i) spectral  
117 features of the phonemes (ii) the same 14 phonetic features that this manuscript is concerned with  
118 (iii) one-hot encoding of consonants (e.g. /b/, /p/) (iv) one-hot encoding of vowels (e.g. /ae/, /oo/)  
119 and (v) all the other higher order features that we have analysed in the study. We tested these  
120 different formats of representing speech sounds for their relative timecourse of decodability.  
121 Unfortunately, the representations are too correlated to make any strong claims in one direction  
122 or another, and there was no clear temporal separation between the different formats. Future  
123 controlled studies may be able to associate different moments in the processing trajectory with  
124 different representational formats, once they have been sufficiently de-correlated in the design

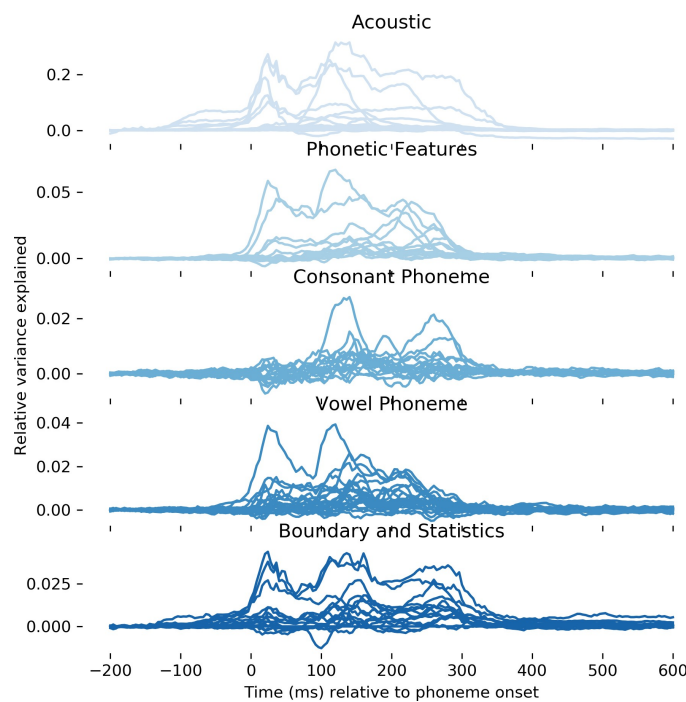

Supplementary Figure 14: **Decoding different speech sound representational formats.** Each trace represents a different feature within the feature family displayed on each row.



125

## Spatial evolution of encoding

### 1.4.1. Beta coefficients of decoding model

127 Here we show the coefficients of a linear decoding model averaged across participants, for  
 128 each of the 31 features. Each participant and each repetition of the story contains 25259 individ-  
 129 ual phoneme responses.

130 To evaluate statistical significance we also ran the decoding analysis on shu<sup>⊖</sup>ed versions of  
 131 each feature, for each participant and repetition. We computed a metric of trajectory structure  
 132 which was a weighted combination of range of movement ( $m$ , maximum cosine distance minus  
 133 minimum), smoothness ( $s$ , mean absolute step size at each time sample) and variance ( $v$ , standard  
 134 deviation across time samples), thus:

$$\frac{m}{s} \sqrt{v} \quad (1)$$

135 We compute this metric for the x co-ordinates and y co-ordinates separately, and then average  
 136 the result. To test statistical reliability we ran an independent t-test between the coefficients from  
 137 the true features and the coefficients from the shu<sup>⊖</sup>ed features.

138 Some notable results are the robust position-based trajectories such as phoneme location in  
 139 the word (True Mean = 1.72, SD = 0.85, Null Mean = 1.06, SD = 0.5,  $t = 4.25$ ,  $p < .001$ ) and  
 140 phonetic feature trajectories such as voicing (True Mean = 1.42, SD = 0.59, Null Mean = 1.04,  
 141 SD = 0.44,  $t = 3.24$ ,  $p < .001$ ), nasality (True Mean = 1.34, SD = 0.57, Null Mean = 1.07, SD  
 142 = 0.4,  $t = 2.56$ ,  $p = 0.01$ ) and fricative (True Mean = 1.32, SD = 0.55, Null Mean = 1.09, SD =  
 143 0.38,  $t = 2.26$ ,  $p = 0.03$ ).

144 Our results for all of the 31 features are as follows: Word length: True Mean = 1.09, SD =  
 145 0.63, Null Mean = 1.19, SD = 0.5,  $t = -0.78$ ,  $p = 0.44$ . Root Onset: True Mean = 1.7, SD = 0.62,  
 146 Null Mean = 1.18, SD = 0.49,  $t = 4.27$ ,  $p = 0.0$ . Phon. onset distance: True Mean = 1.28, SD =  
 147 0.73, Null Mean = 1.04, SD = 0.44,  $t = 1.86$ ,  $p = 0.07$ . Entropy: True Mean = 1.58, SD = 0.62,  
 148 Null Mean = 1.05, SD = 0.45,  $t = 4.43$ ,  $p = 0.0$ . Phon. Loc Sentence: True Mean = 0.86, SD =  
 149 0.97, Null Mean = 1.11, SD = 0.42,  $t = -1.51$ ,  $p = 0.13$ . Phon. Loc Syllable: True Mean = 1.39,  
 150 SD = 0.56, Null Mean = 1.03, SD = 0.36,  $t = 3.44$ ,  $p = 0.0$ . Phon. Loc Word: True Mean = 1.72,  
 151 SD = 0.85, Null Mean = 1.06, SD = 0.5,  $t = 4.25$ ,  $p = 0.0$ . Prefix Onset: True Mean = 1.21, SD  
 152 = 0.54, Null Mean = 1.18, SD = 0.47,  $t = 0.34$ ,  $p = 0.74$ . Primary Stress: True Mean = 1.52,  
 153 SD = 0.49, Null Mean = 1.13, SD = 0.5,  $t = 3.48$ ,  $p = 0.0$ . Secondary Stress: True Mean = 1.1,  
 154 SD = 0.5, Null Mean = 0.95, SD = 0.37,  $t = 1.56$ ,  $p = 0.12$ . Sequence Frequency: True Mean  
 155 = 1.79, SD = 0.83, Null Mean = 1.09, SD = 0.39,  $t = 4.85$ ,  $p = 0.0$ . Suffix Onset: True Mean =  
 156 1.38, SD = 0.51, Null Mean = 0.98, SD = 0.42,  $t = 3.85$ ,  $p = 0.0$ . Surprisal: True Mean = 1.71,  
 157 SD = 0.71, Null Mean = 0.97, SD = 0.32,  $t = 6.06$ ,  $p = 0.0$ . Syll. Loc Word: True Mean = 1.77,  
 158 SD = 0.92, Null Mean = 1.09, SD = 0.47,  $t = 4.23$ ,  $p = 0.0$ . Syllable Onset: True Mean = 1.52,  
 159 SD = 0.43, Null Mean = 1.1, SD = 0.34,  $t = 4.86$ ,  $p = 0.0$ . Word Onset: True Mean = 1.44, SD  
 160 = 0.62, Null Mean = 1.24, SD = 0.59,  $t = 1.53$ ,  $p = 0.13$ . Word Onset: True Mean = 1.68, SD =  
 161 0.57, Null Mean = 1.12, SD = 0.49,  $t = 4.83$ ,  $p = 0.0$ . Approximant: True Mean = 1.27, SD =  
 162 0.49, Null Mean = 1.14, SD = 0.38,  $t = 1.36$ ,  $p = 0.18$ . Fricative: True Mean = 1.32, SD = 0.55,  
 163 Null Mean = 1.09, SD = 0.38,  $t = 2.26$ ,  $p = 0.03$ . Nasal: True Mean = 1.34, SD = 0.57, Null  
 164 Mean = 1.07, SD = 0.4,  $t = 2.56$ ,  $p = 0.01$ . Plosive: True Mean = 1.33, SD = 0.39, Null Mean =  
 165 1.16, SD = 0.44,  $t = 1.87$ ,  $p = 0.06$ . Vowel: True Mean = 1.4, SD = 0.36, Null Mean = 1.11, SD  
 166 = 0.41,  $t = 3.38$ ,  $p = 0.0$ . Voicing: True Mean = 1.42, SD = 0.59, Null Mean = 1.04, SD = 0.44,  
 167  $t = 3.24$ ,  $p = 0.0$ . Glottal: True Mean = 1.06, SD = 0.41, Null Mean = 1.12, SD = 0.5,  $t = -0.61$ ,

<sup>168</sup>  $p = 0.54$ . Coronal: True Mean = 1.36, SD = 0.43, Null Mean = 1.15, SD = 0.48,  $t = 2.13$ ,  $p =$   
<sup>169</sup>  $0.04$ . Dental: True Mean = 1.25, SD = 0.49, Null Mean = 1.12, SD = 0.42,  $t = 1.34$ ,  $p = 0.18$ .  
<sup>170</sup> High Vowel: True Mean = 1.31, SD = 0.52, Null Mean = 1.06, SD = 0.41,  $t = 2.42$ ,  $p = 0.02$ .  
<sup>171</sup> Labial: True Mean = 1.25, SD = 0.51, Null Mean = 1.14, SD = 0.49,  $t = 1.01$ ,  $p = 0.31$ . Low  
<sup>172</sup> Vowel: True Mean = 1.18, SD = 0.53, Null Mean = 1.06, SD = 0.41,  $t = 1.18$ ,  $p = 0.24$ . Middle  
<sup>173</sup> Vowel: True Mean = 1.19, SD = 0.42, Null Mean = 1.16, SD = 0.54,  $t = 0.32$ ,  $p = 0.75$ . Velar:  
<sup>174</sup> True Mean = 1.13, SD = 0.41, Null Mean = 1.09, SD = 0.5,  $t = 0.45$ ,  $p = 0.65$ .

<sup>175</sup> *1.14.1. Trajectory for each feature*

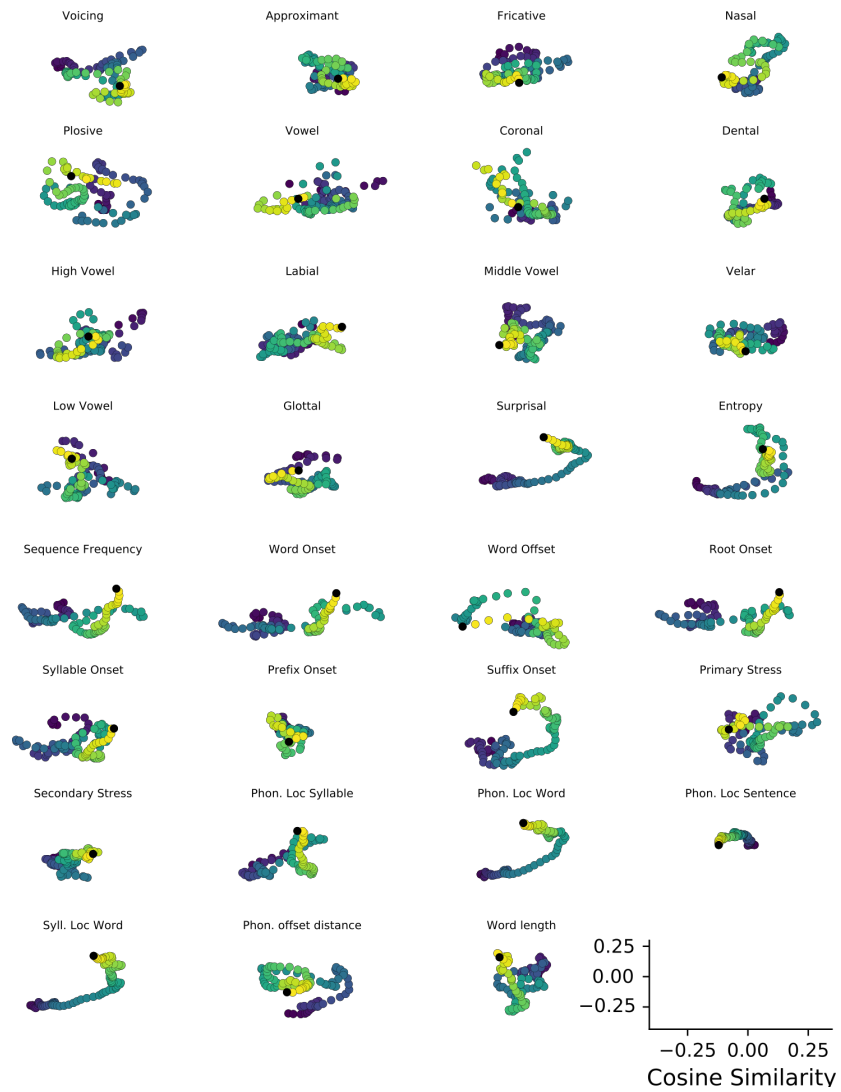

Supplementary Figure 15: **Trajectory for each feature.** Showing the movement of the decoding coefficients within sensor space. Black dot shows the ending point of the trajectory. More purple colours represent earlier moments in time. Details are the same as Main Figure 4B.

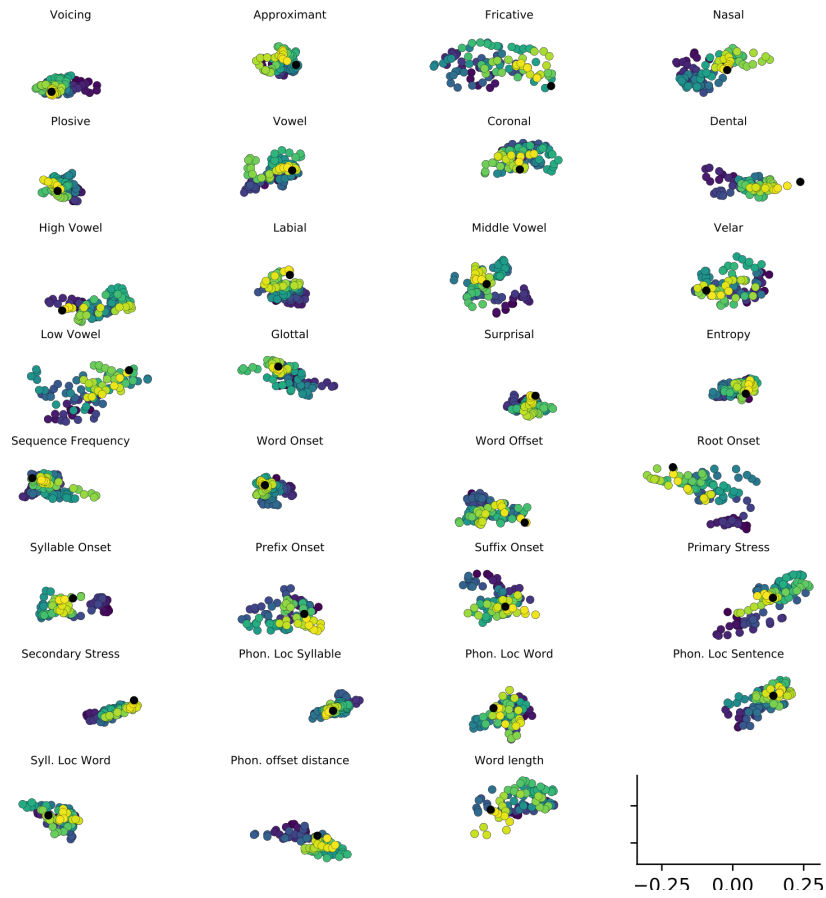

Supplementary Figure 16: **Trajectory when shuffling trial correspondence in decoding (i.e. null trajectory for comparison)**. Black dot shows the ending point of the trajectory. More purple colours represent earlier moments in time.

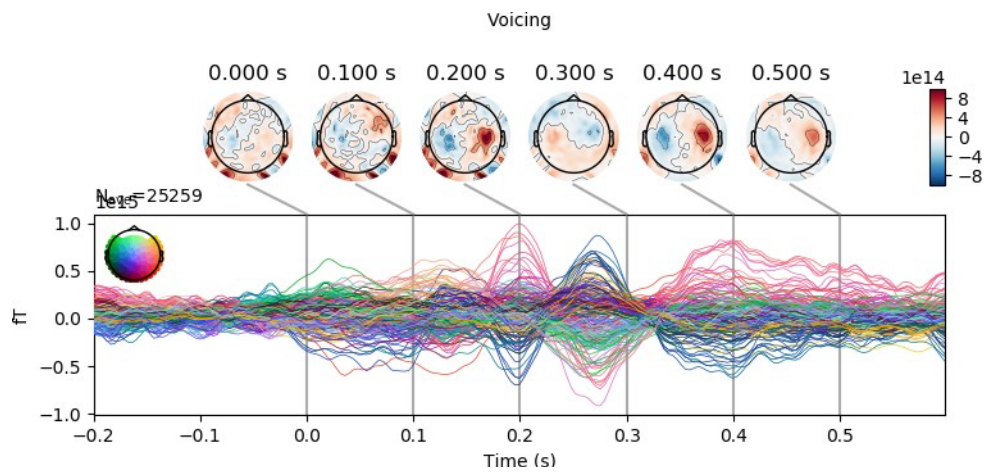

Supplementary Figure 17: **Coefficients for Voicing**. x-axis corresponds to time in seconds relative to phoneme onset. y-axis corresponds to the signed magnitude of the decoding coefficient which maps from sensor space to feature space. Each trace corresponds to a different MEG sensor.

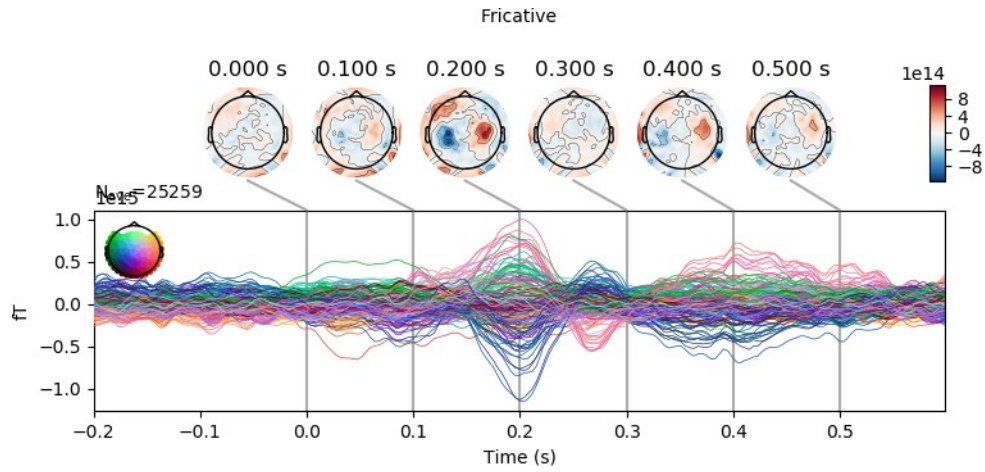

Supplementary Figure 18: **Coefficients for Fricative.** x-axis corresponds to time in seconds relative to phoneme onset. y-axis corresponds to the signed magnitude of the decoding coefficient which maps from sensor space to feature space. Each trace corresponds to a different MEG sensor.

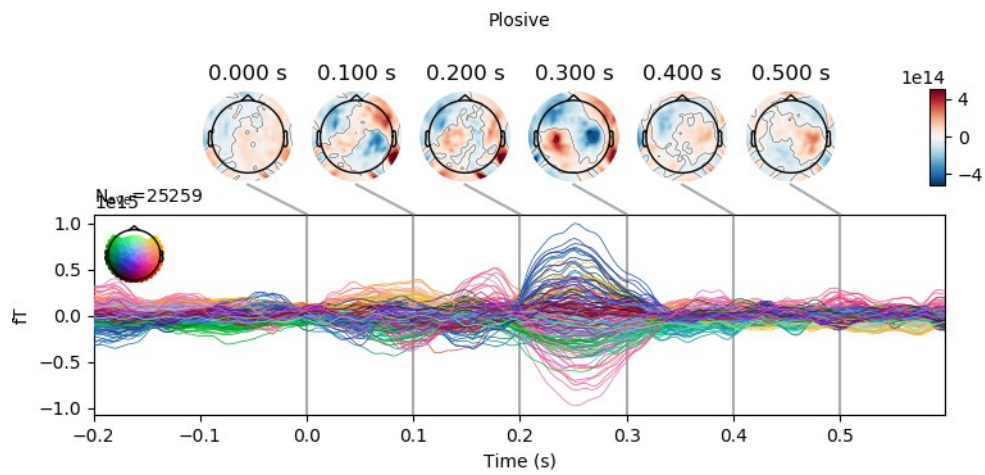

Supplementary Figure 19: **Coefficients for Plosive.** x-axis corresponds to time in seconds relative to phoneme onset. y-axis corresponds to the signed magnitude of the decoding coefficient which maps from sensor space to feature space. Each trace corresponds to a different MEG sensor.

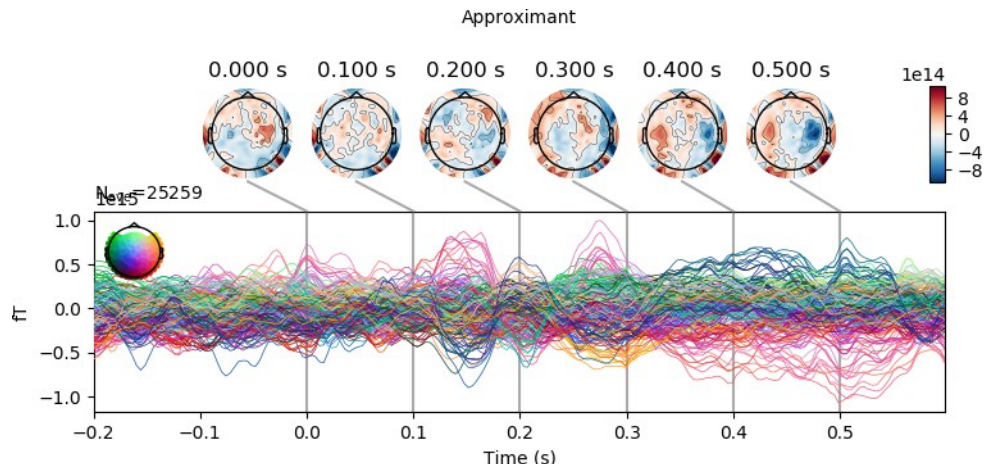

Supplementary Figure 20: **Coefficients for Approximant**. x-axis corresponds to time in seconds relative to phoneme onset. y-axis corresponds to the signed magnitude of the decoding coefficient which maps from sensor space to feature space. Each trace corresponds to a different MEG sensor.

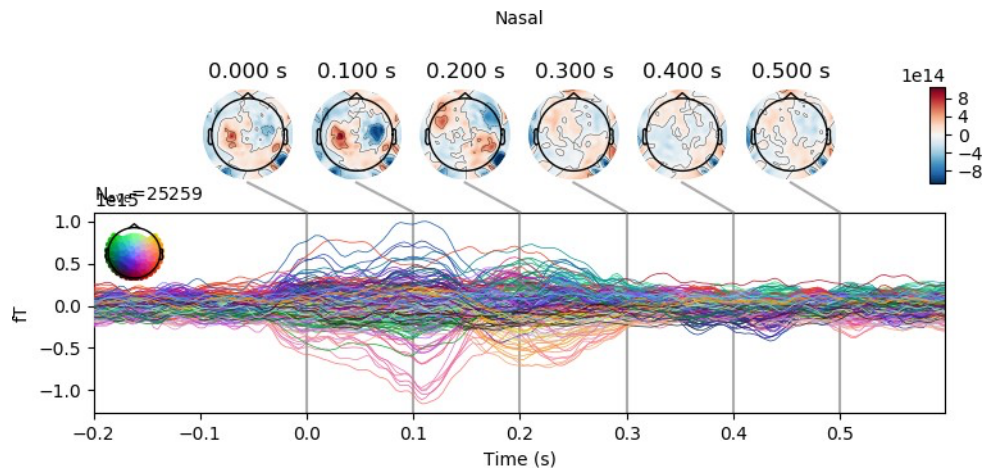

Supplementary Figure 21: **Coefficients for Nasal**. x-axis corresponds to time in seconds relative to phoneme onset. y-axis corresponds to the signed magnitude of the decoding coefficient which maps from sensor space to feature space. Each trace corresponds to a different MEG sensor.

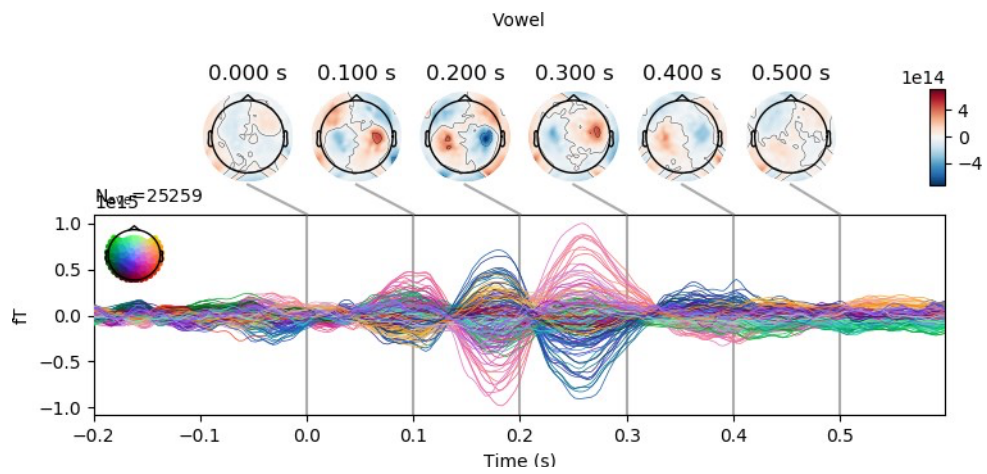

Supplementary Figure 22: **Coefficients for Vowel.** x-axis corresponds to time in seconds relative to phoneme onset. y-axis corresponds to the signed magnitude of the decoding coefficient which maps from sensor space to feature space. Each trace corresponds to a different MEG sensor.



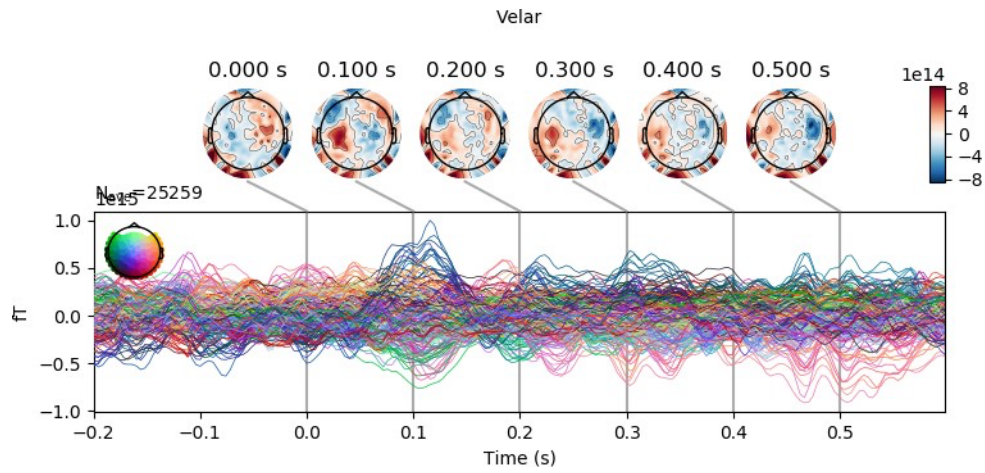

Supplementary Figure 23: **Coefficients for Velar.** x-axis corresponds to time in seconds relative to phoneme onset. y-axis corresponds to the signed magnitude of the decoding coefficient which maps from sensor space to feature space. Each trace corresponds to a different MEG sensor.

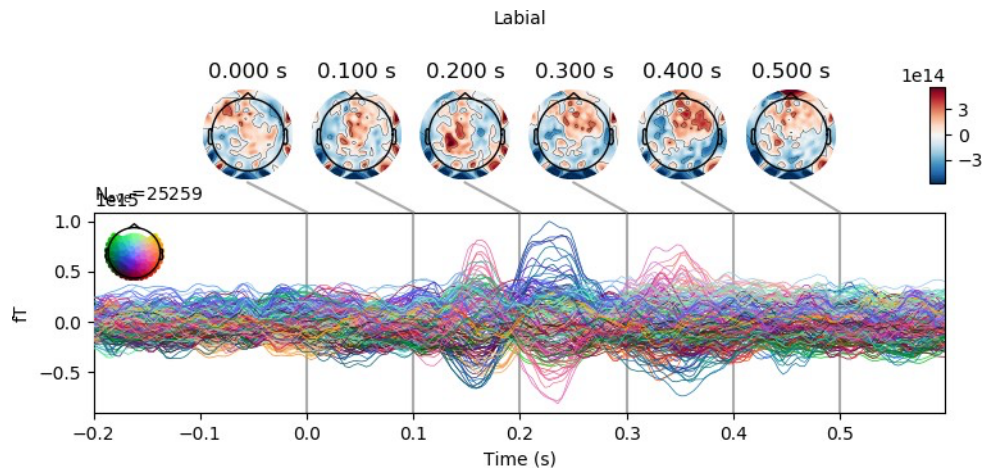

Supplementary Figure 24: **Coefficients for Labial.** x-axis corresponds to time in seconds relative to phoneme onset. y-axis corresponds to the signed magnitude of the decoding coefficient which maps from sensor space to feature space. Each trace corresponds to a different MEG sensor.

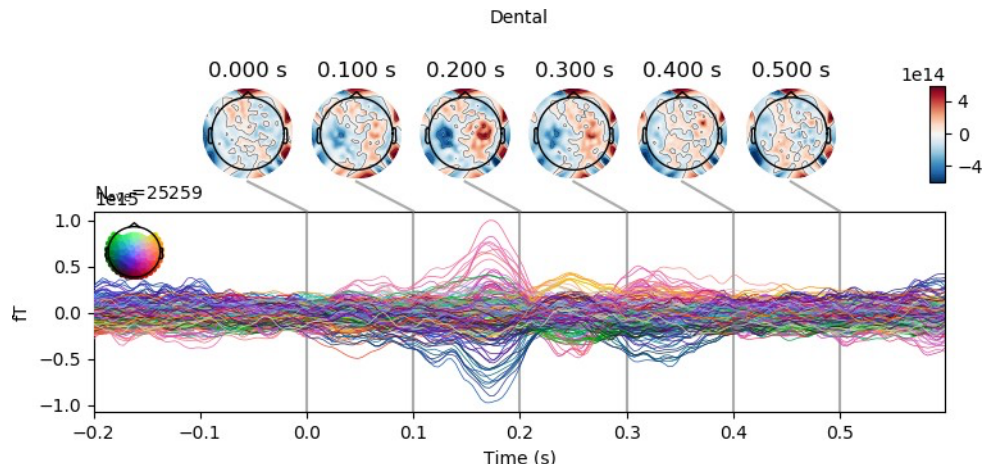

Supplementary Figure 25: **Coefficients for Dental**. x-axis corresponds to time in seconds relative to phoneme onset. y-axis corresponds to the signed magnitude of the decoding coefficient which maps from sensor space to feature space. Each trace corresponds to a different MEG sensor.

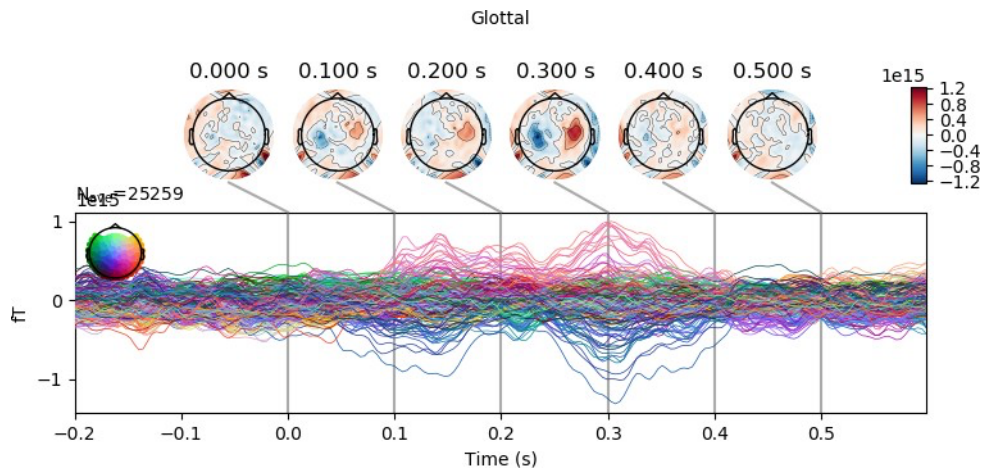

Supplementary Figure 26: **Coefficients for Glottal**. x-axis corresponds to time in seconds relative to phoneme onset. y-axis corresponds to the signed magnitude of the decoding coefficient which maps from sensor space to feature space. Each trace corresponds to a different MEG sensor.

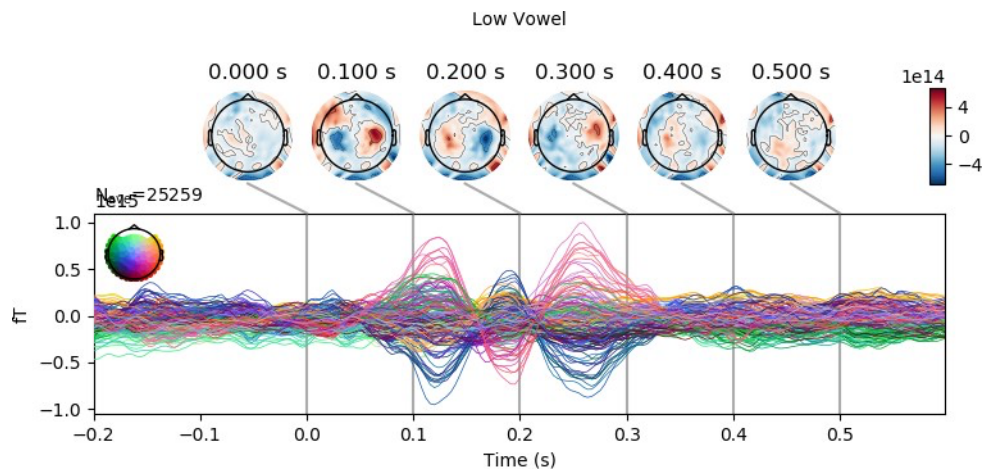

Supplementary Figure 27: **Coefficients for Low Vowel.** x-axis corresponds to time in seconds relative to phoneme onset. y-axis corresponds to the signed magnitude of the decoding coefficient which maps from sensor space to feature space. Each trace corresponds to a different MEG sensor.

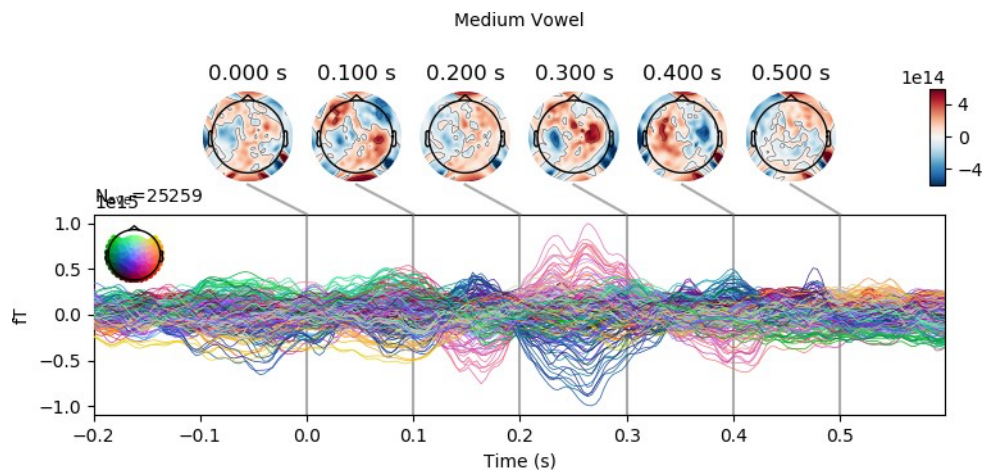

Supplementary Figure 28: **Coefficients for Mid Vowel.** x-axis corresponds to time in seconds relative to phoneme onset. y-axis corresponds to the signed magnitude of the decoding coefficient which maps from sensor space to feature space. Each trace corresponds to a different MEG sensor.

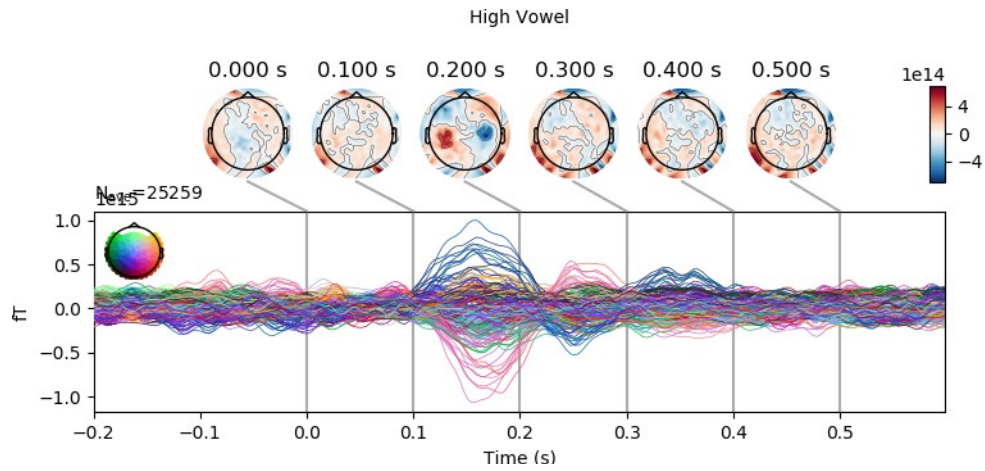

Supplementary Figure 29: **Coefficients for High Vowel**. x-axis corresponds to time in seconds relative to phoneme onset. y-axis corresponds to the signed magnitude of the decoding coefficient which maps from sensor space to feature space. Each trace corresponds to a different MEG sensor.

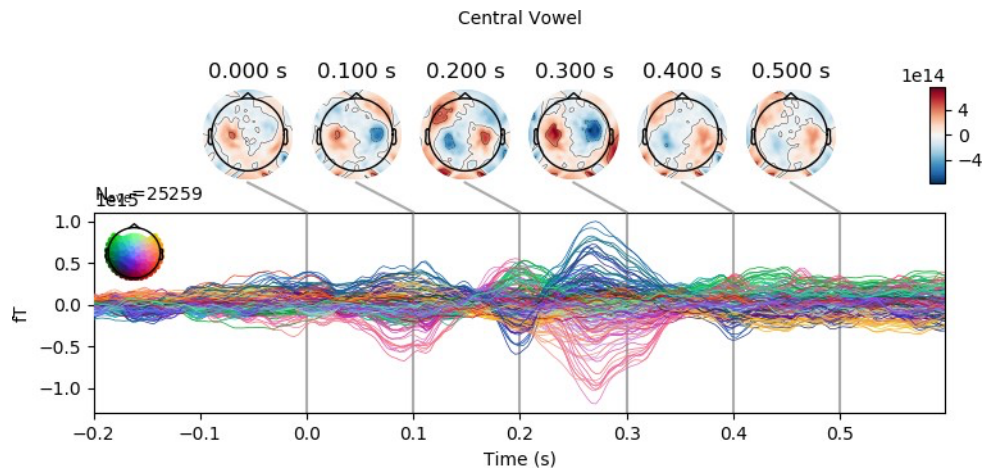

Supplementary Figure 30: **Coefficients for Central Vowel**. x-axis corresponds to time in seconds relative to phoneme onset. y-axis corresponds to the signed magnitude of the decoding coefficient which maps from sensor space to feature space. Each trace corresponds to a different MEG sensor.



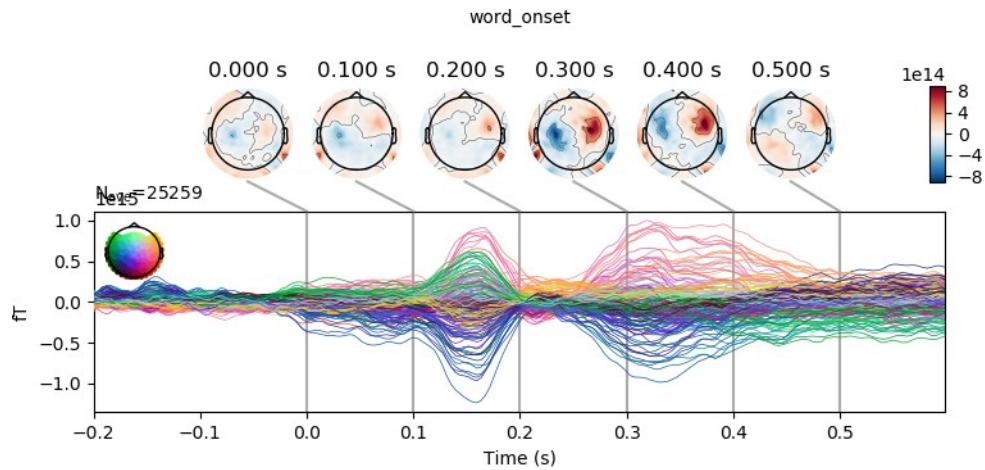

Supplementary Figure 31: **Coefficients for Word Onset.** x-axis corresponds to time in seconds relative to phoneme onset. y-axis corresponds to the signed magnitude of the decoding coefficient which maps from sensor space to feature space. Each trace corresponds to a different MEG sensor.

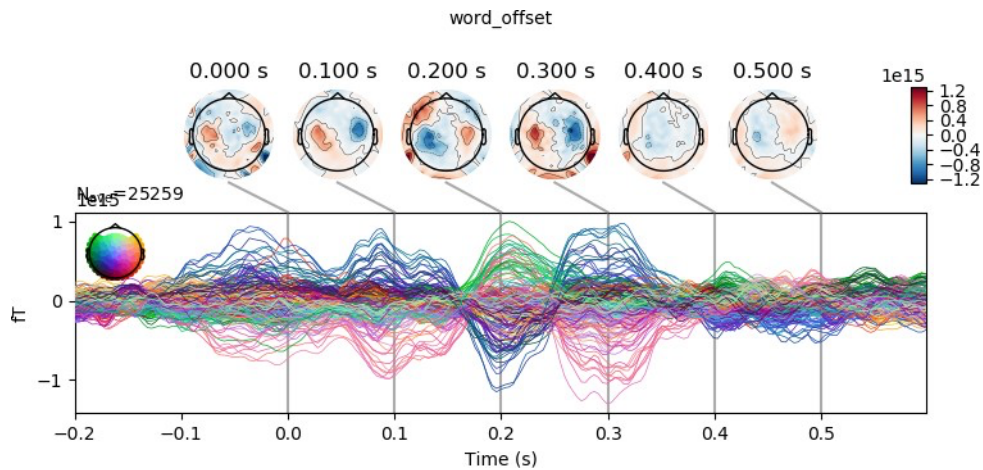

Supplementary Figure 32: **Coefficients for Word Offset.** x-axis corresponds to time in seconds relative to phoneme onset. y-axis corresponds to the signed magnitude of the decoding coefficient which maps from sensor space to feature space. Each trace corresponds to a different MEG sensor.

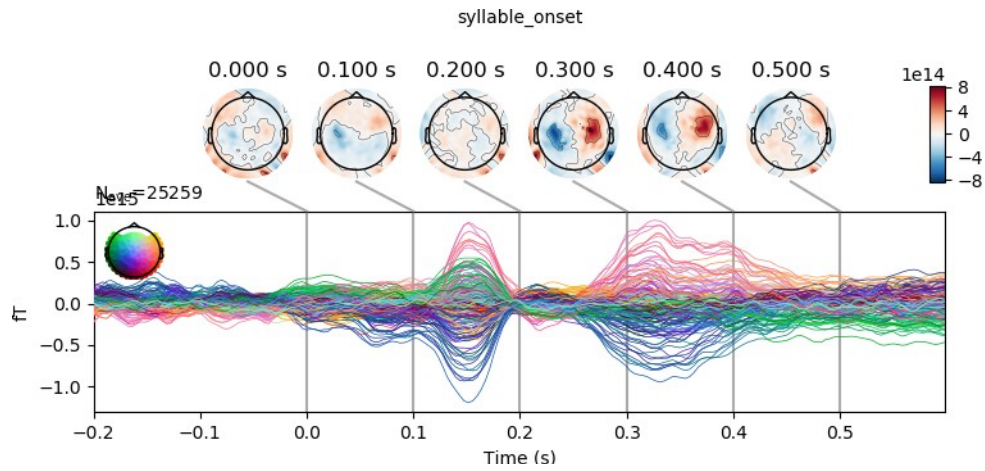

Supplementary Figure 33: **Coefficients for Syllable Onset.** x-axis corresponds to time in seconds relative to phoneme onset. y-axis corresponds to the signed magnitude of the decoding coefficient which maps from sensor space to feature space. Each trace corresponds to a different MEG sensor.

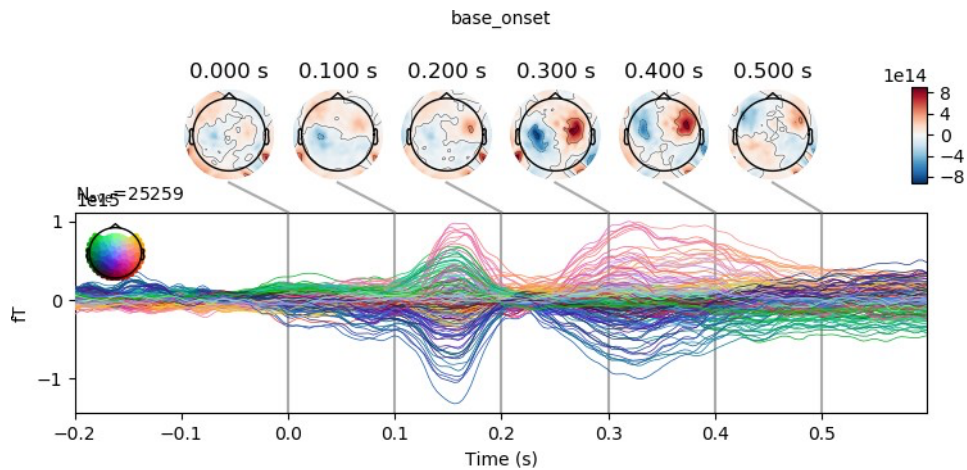

Supplementary Figure 34: **Coefficients for Root Morpheme onset.** x-axis corresponds to time in seconds relative to phoneme onset. y-axis corresponds to the signed magnitude of the decoding coefficient which maps from sensor space to feature space. Each trace corresponds to a different MEG sensor.

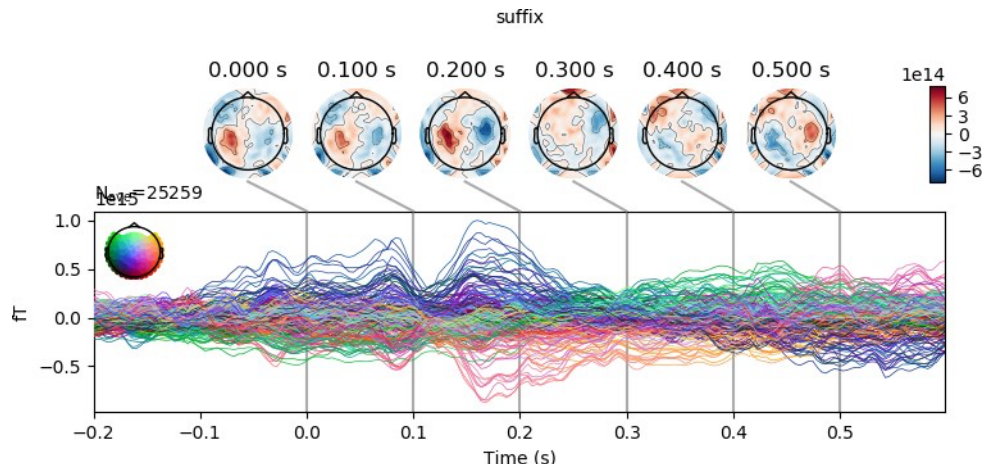

Supplementary Figure 35: **Coefficients for Suffix onset.** x-axis corresponds to time in seconds relative to phoneme onset. y-axis corresponds to the signed magnitude of the decoding coefficient which maps from sensor space to feature space. Each trace corresponds to a different MEG sensor.

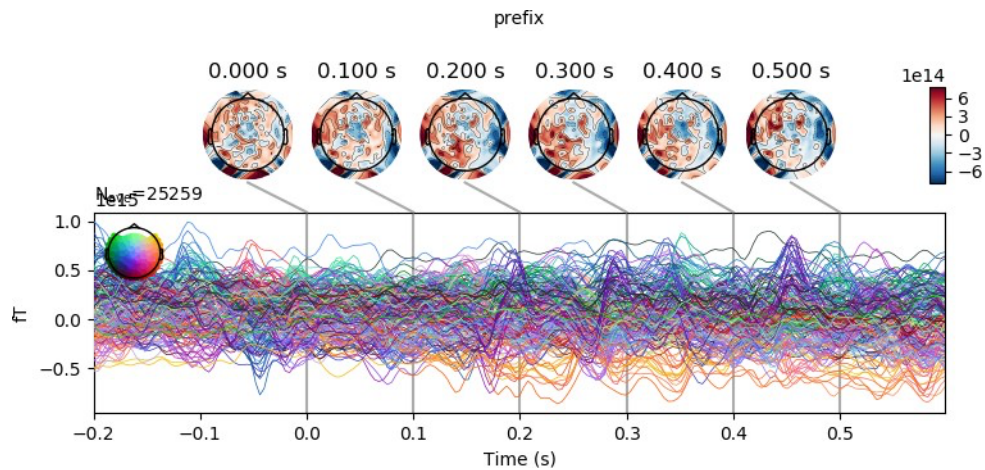

Supplementary Figure 36: **Coefficients for Prefix onset.** x-axis corresponds to time in seconds relative to phoneme onset. y-axis corresponds to the signed magnitude of the decoding coefficient which maps from sensor space to feature space. Each trace corresponds to a different MEG sensor.

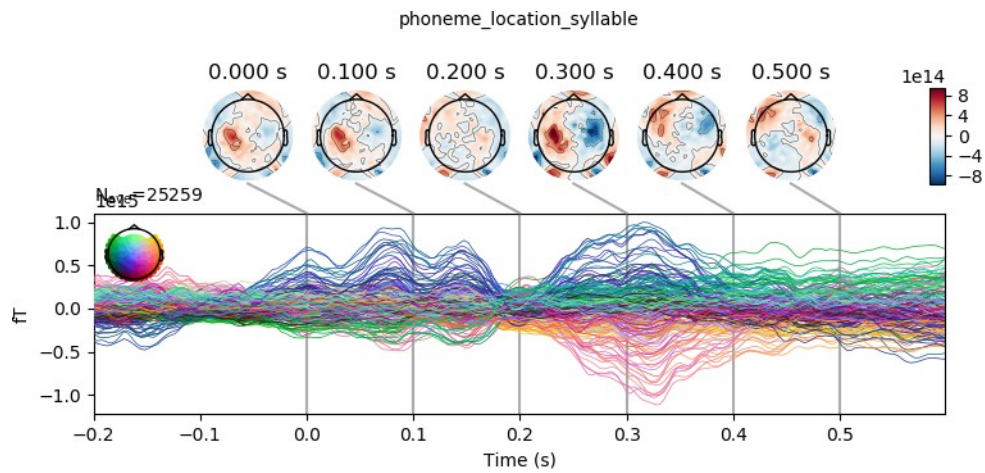

Supplementary Figure 37: **Coefficients for Phoneme location in syllable.** x-axis corresponds to time in seconds relative to phoneme onset. y-axis corresponds to the signed magnitude of the decoding coefficient which maps from sensor space to feature space. Each trace corresponds to a different MEG sensor.

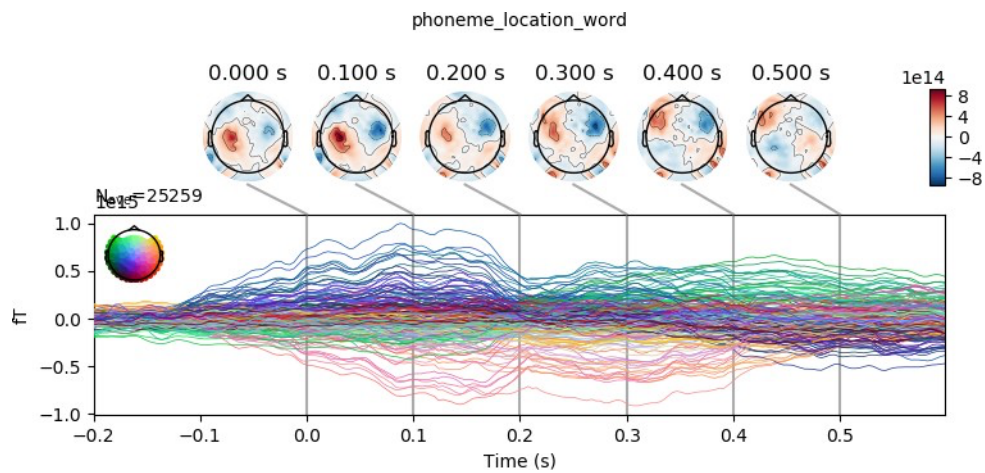

Supplementary Figure 38: **Coefficients for Phoneme location in word.** x-axis corresponds to time in seconds relative to phoneme onset. y-axis corresponds to the signed magnitude of the decoding coefficient which maps from sensor space to feature space. Each trace corresponds to a different MEG sensor.



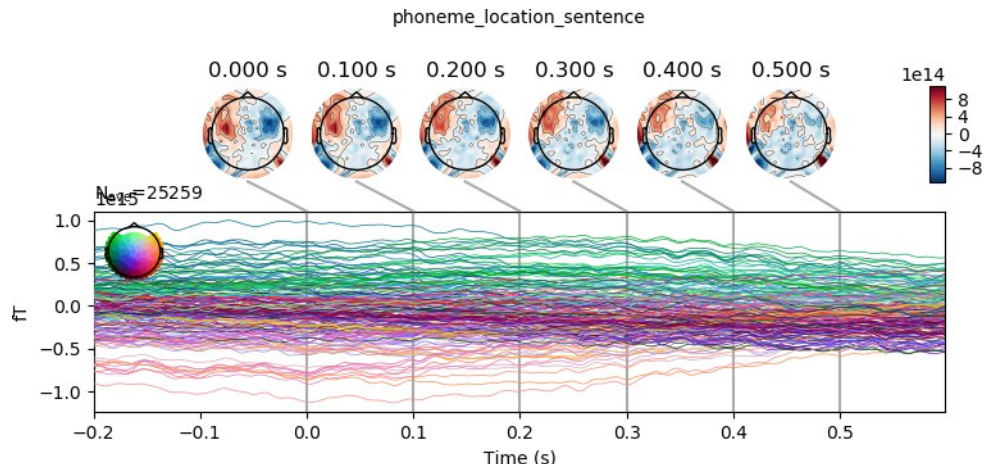

Supplementary Figure 39: **Coefficients for Phoneme location in sentence.** x-axis corresponds to time in seconds relative to phoneme onset. y-axis corresponds to the signed magnitude of the decoding coefficient which maps from sensor space to feature space. Each trace corresponds to a different MEG sensor.

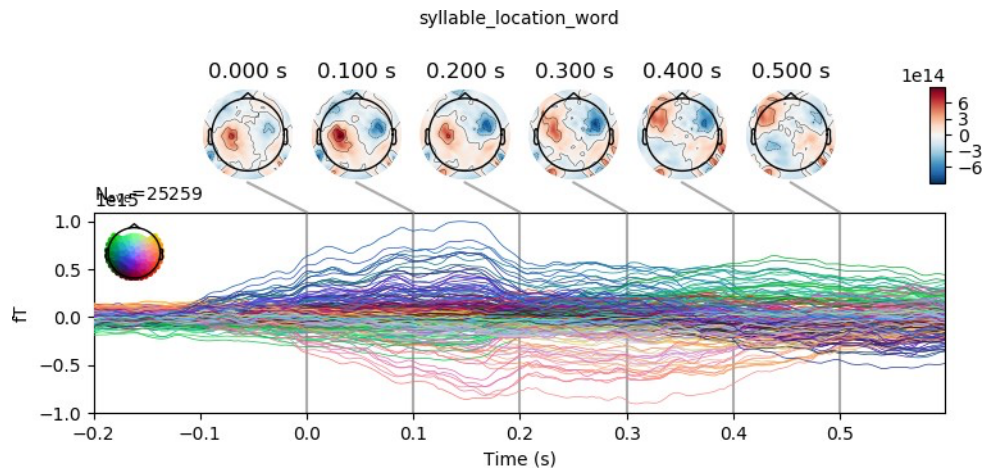

Supplementary Figure 40: **Coefficients for Syllable location in word.** x-axis corresponds to time in seconds relative to phoneme onset. y-axis corresponds to the signed magnitude of the decoding coefficient which maps from sensor space to feature space. Each trace corresponds to a different MEG sensor.

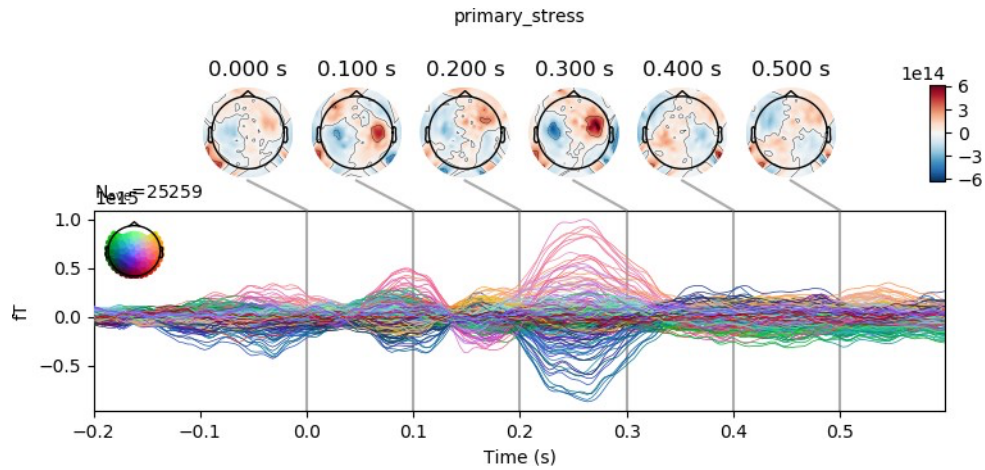

Supplementary Figure 41: **Coefficients for Primary Stress on syllable.** x-axis corresponds to time in seconds relative to phoneme onset. y-axis corresponds to the signed magnitude of the decoding coefficient which maps from sensor space to feature space. Each trace corresponds to a different MEG sensor.

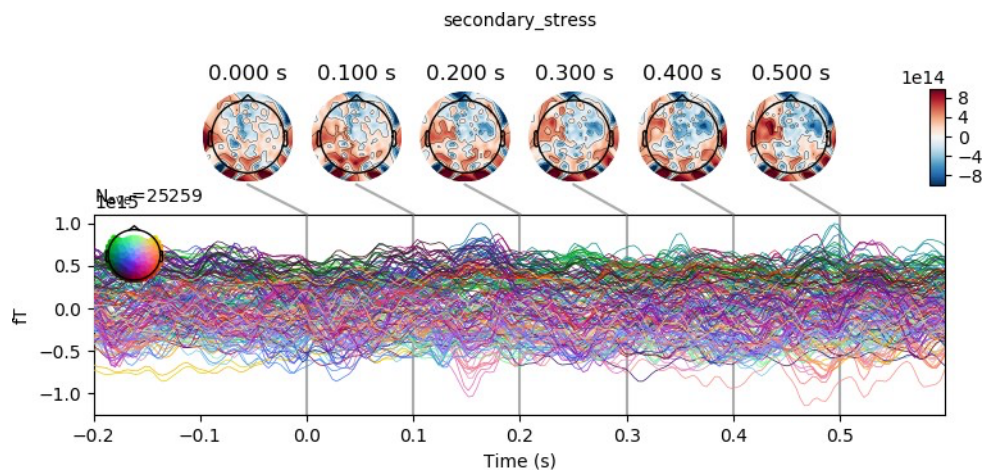

Supplementary Figure 42: **Coefficients for Secondary Stress on syllable.** x-axis corresponds to time in seconds relative to phoneme onset. y-axis corresponds to the signed magnitude of the decoding coefficient which maps from sensor space to feature space. Each trace corresponds to a different MEG sensor.

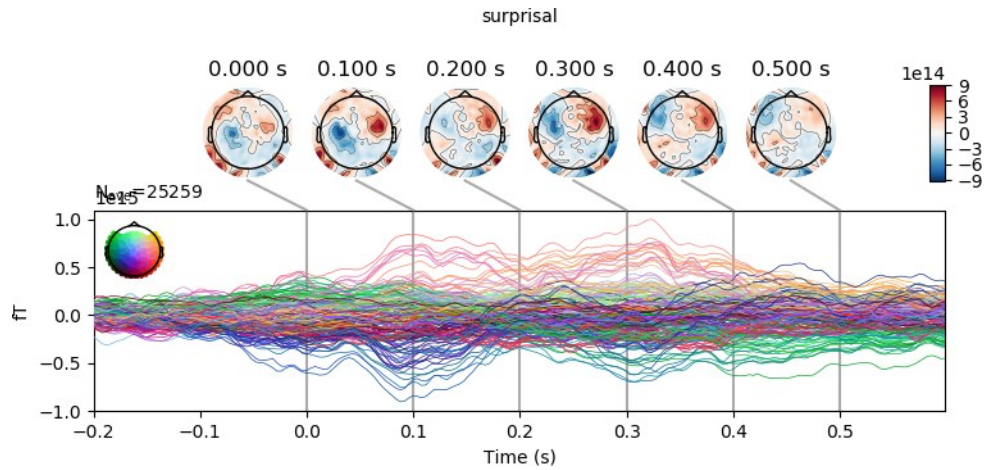

Supplementary Figure 43: **Coefficients for Surprisal**. x-axis corresponds to time in seconds relative to phoneme onset. y-axis corresponds to the signed magnitude of the decoding coefficient which maps from sensor space to feature space. Each trace corresponds to a different MEG sensor.

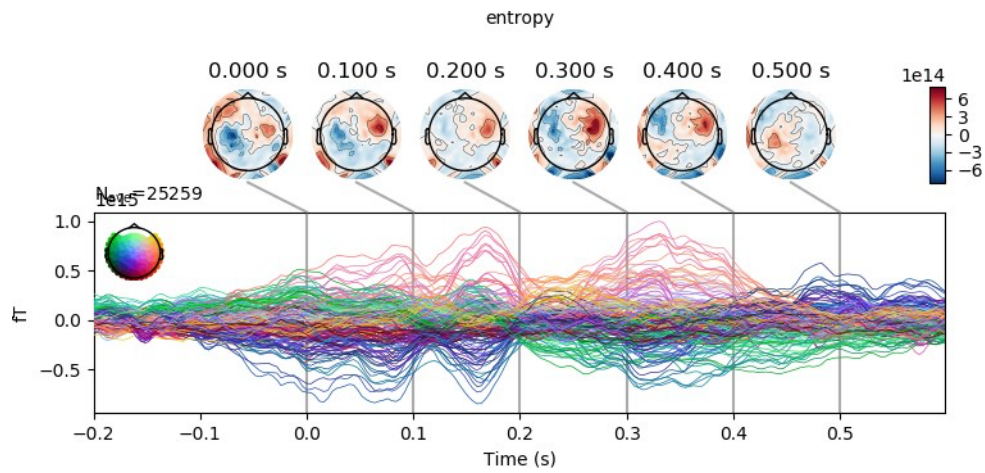

Supplementary Figure 44: **Coefficients for Entropy**. x-axis corresponds to time in seconds relative to phoneme onset. y-axis corresponds to the signed magnitude of the decoding coefficient which maps from sensor space to feature space. Each trace corresponds to a different MEG sensor.

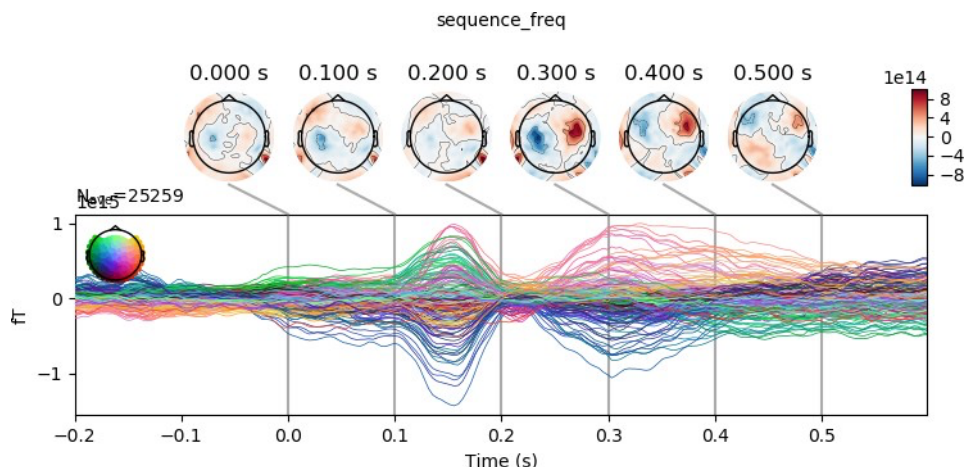

Supplementary Figure 45: **Coefficients for Sequence Frequency.** x-axis corresponds to time in seconds relative to phoneme onset. y-axis corresponds to the signed magnitude of the decoding coefficient which maps from sensor space to feature space. Each trace corresponds to a different MEG sensor.

184 **References**

- 185 [1] Mesgarani, N., Cheung, C., Johnson, K. & Chang, E. F. Phonetic feature encoding in human superior temporal  
186 gyrus. *Science* **343**, 1006–1010 (2014).
- 187 [2] Khalighinejad, B., da Silva, G. C. & Mesgarani, N. Dynamic encoding of acoustic features in neural responses to  
188 continuous speech. *Journal of Neuroscience* **37**, 2176–2185 (2017).
- 189 [3] Gwilliams, L., Linzen, T., Poeppel, D. & Marantz, A. In spoken word recognition, the future predicts the past.  
190 *Journal of Neuroscience* **38**, 7585–7599 (2018).
